# Supplementary material for: Human major infections: Tuberculosis, treponematoses, leprosy—A paleopathological perspective of their evolution
Source: PLoS One. 2021 Feb 25;16(2):e0243687. doi: 10.1371/journal.pone.0243687 (PMC7906324; doi:10.1371/journal.pone.0243687)
Supplement: S1 Table — Locations, dating, sample size and numbers of pathological cases for each of the studied diseases. (XLSX) [file pone.0243687.s001.xlsx]

## Sheet: Treponematoses
Chapter	Site	State	Period	exact date	total N	Total cases	calculated prevalence	Comments
5	Tatham mound	Florida	1492-present	??	289	5.001	1.73045	Post European contact
13	Chirikof Island	Alaska	1492-present		73	9.001	12.3301	Post European contact, cranial measuremeents only
11	Skull Gulch	California	1492-present	1150-1500	19	2.001	10.5316	Post European contact
6	Hiwassee Island	Tennessee	1492-present	Late prehistoric (H) (900-1650AD)	54	1	1.85185	Post European contact
10	Hawikku	New Mexico	1000-1492	1425-1680	142	38	26.7606	AD-European contact
6	1Gr2	Alabama	1000-1492	1400-1550	51	2.001	3.92353	AD-European contact
16	Santiago Tlateloco	Mexico	1000-1492	1300-1521	141	4.001	2.83759	AD-European contact
16	Mexioc city subway tunnels 1 and 3	Mexico	1000-1492	1300-1521	208	18	8.65385	AD-European contact
16	Mexico city subway tunnel 2	Mexico	1000-1492	1300-1521	100	22	22	AD-European contact
6	Belcher Mound	Louisiana	1000-1492	1200-1600	48	3.001	6.25208	AD-European contact
18	Tutu	Virgin Islands	1000-1492	1170-1535	42	20	47.619	AD-European contact
3	Nahrlwold #1	New York	1000-1492	1300-1400AD	4	1	25	AD-European contact
6	Moundville (Poweell sample)	Alabama	1000-1492	1050-1650	600	33	5.5	AD-European contact
15	Las Palmas	Mexico	1000-1492		83	17	20.4819	AD-European contact
6	Hiwassee Island	Tennessee	1000-1492	Late Prehistoric	361	2.001	0.554294	AD-European contact
6	Lake George	Mississippi	1000-1492	Late prehistoric	180	2.001	1.11167	AD-European contact
6	Winterville	Mississippi	1000-1492	Late prehistoric	24	1.001	4.17083	AD-European contact
6	Greer	Arkansas	1000-1492	Late prehistoric	8	4.001	50.0125	AD-European contact
6	Boyott's Filed	Arkansas	1000-1492	Late Prehistoric	37	1.001	2.70541	AD-European contact
4	7 ossuaries	North Carolina	1000-1492	800-1715	297	92	30.9764	N based on tibiae
9	Kelly	Nebraska	1000-1492	Central Plains	36	1.001	2.78056	AD-European contact
5	Tierra Verde	Florida	1000-1492	800-1600	18	3.001	16.6722	AD-European contact
5	Aqui Esta	Florida	1000-1492	800-1600	26	1.001	3.85	AD-European contact
5	Safety Harbour	Florida	1000-1492	800-1600	113	4.001	3.54071	AD-European contact
5	Weeki Wachee	Florida	1000-1492	800-1600	39	1.001	2.56667	AD-European contact
5	Tatham Mound	Florida	1000-1492	800-1600	28			AD-European contact
5	Seven Mile Bend	Georgia	1000-1492	800-1600	18	2.001	11.1167	AD-European contact
5	Couper Field	Georgia	1000-1492	800-1600	44	2.001	4.54773	AD-European contact
5	Chauga	Georgia	1000-1492	800-1600	8	2.001	25.0125	AD-European contact
5	Irene Mortuary	Georgia	1000-1492	800-1600	241	20.001	8.29917	AD-European contact
6	Perry	Alabama	1000-1492	Mississippian	83	1.001	1.20602	AD-European contact
6	Kogers Island	Alabama	1000-1492	Mississippian	108	3.001	2.7787	AD-European contact - Mississippian
6	Lubbub Creek	Alabama	1000-1492	Mississippian	103			AD-European contact
6	Copeland Bayou	Alabama	1000-1492	Mississippian	19	5.001	26.3211	AD-European contact
6	Andrews Place	Alabama	1000-1492	Mississippian	9	6.001	66.6778	AD-European contact
6	Nodena	Arkansas	1000-1492	Mississippian	228	9.001	3.94781	AD-European contact
6	Zebree	Arkansas	1000-1492	Mississippian	32			AD-European contact
6	Parkin	Arkansas	1000-1492	Mississippian (800-1600AD)	14	1.001	7.15	AD-European contact
8	Schild	Illinois	1000-1492	Mississippian	346	4	1.15607	AD-European contact
9	Steed-Kisker	Missouri	1000-1492	Middle Mississippian	13	1.001	7.7	AD-European contact
16	Cueva de la Cecilia	Mexico	1000-1492	1100-1300	17	7	41.1765	AD-European contact
16	Cueva de la Paila	Mexico	1000-1492	1100-1300	35	17	48.5714	AD-European contact
16	Cueva de la candelaria	Mexico	1000-1492	1100-1300	116	60	51.7241	AD-European contact
16	Santo Domingo	Mexico	1000-1492	900-1500	4	2.001	50.025	AD-European contact
8	Late Woodlands site	Illinois	1000-1000	Late Woodland	213	11	5.16432	BC-AD
9	Casey's Mound Group	Iowa	1000-1000	Late Woodland	4	4	100	BC-AD
6	Kellogg	Mississippi	1000-1492	Early mississippian	43	1.001	2.32791	AD-European contact
6	Chucalissa	Tennessee	1000-1492	829-1229	104	1.001	0.9625	AD-European contact
6	1Pi33	Alabama	1000-1492	900-1200	32	4	12.5	AD-European contact
11	Ven-110	California	1000-1492	900-1150AD	128	26	20.3125	N tibiae
9	Council Bluffs Ossuary	Iowa	1000-1000	Woodland/Post Woodland	10	3	30	BC-AD
6	Austin	Mississippi	1000-1492	800-1200	164	5	3.04878	AD-European contact
7	East texas sites	Texas	1000-1492	Late prehistoric (100BC-1550AD)	422	46	10.9005	inc.174 Historic
7	Gulf coast sites	Texas	1000-1492	Late prehistoric	124	30	24.1935	AD-European contact
3	Black Rock	New Yorl	1000-1000	850	4	1.001	25.025	BC-AD
16	Xochicalco, Morelos	Mexico	1000-1000	700-900	22	17	77.2727	BC-AD
6	1Pi61	Alabama	1000-1000	600-1000	96	8	8.33333	BC-AD
5	Crystal River	Florida	1000-1000	500BC-800AD	75	14.001	18.668	BC-AD
5	Palmer Mound	Florida	1000-1000	500BC-800AD	392	13.001	3.31658	BC-AD
9	Pooler	Iowa	1000-1000	Late Archaic/Early Woodland	19	4	21.0526	BC-AD
12	Departure Bay	British Columbia	1000-1000	2400-1600BP	11	1.001	9.1	BC-AD
9	Haven	Iowa	1000-1000	Middle Woodland	1	1.001	100.1	BC-AD
9	Swift Bird	South Dakota	1000-1000	Middle Woodland	58	7	12.069	BC-AD
8	Middle woodland sites	Illinois	1000-1000	Middle Woodland (200-500BC)	171	4	2.33918	BC-AD
9	Grover Hand Mounds	South Dakota	1000-1000	Middle Woodland	85	10.001	11.7659	BC-AD
9	Arpan Mound	South Dakota	1000-1000	Middle Woodland	35	3.001	8.57429	BC-AD
9	Hopewell Mds	Missouri	1000-1000	Middle Woodland	22	3.001	13.6409	BC-AD
12	Gabriola Island	British Columbia	1000-1000	1400-3240BP	118	17	14.4068	BC-AD
6	Barner	Mississippi	1000-1492	Late Woodland (500-1000BC)	3	1.001	33.3667	AD-European contact
16	Tehaucan Valley, Puebla	Mexico	6000-1000	<900BC	8	3.001	37.5125	BC
19	Pete Klunk Illinois		6000-1000	-920	22			BC
6	Tchefuncte	Louisiana	1000-1492	Woodland	58	5.001	8.62241	AD-European contact
19	Indian Knoll (Kelley's sample)	Kentucky	6000-1000	-1000	813	28	3.44403	BC
11	SBa-1 (sbA-119b)	California	6000-1000	2400-1400BC	50	15	30	BC, number of tibiae
11	Sba-52	California	6000-1000	2400-1400	44	7.001	15.9114	BC
7	Central TX sites	Texas	6000-1000	Middle Archaic-historic (3000-1000BC)	206	26	12.6214	BC
12	Crescent Beach	British Columbia	6000-1000	Dated Back 4000 years	24	2.001	8.3375	BC
12	Argyle Lagoon	British Columbia	6000-1000	5700-3300BP	2	2.001	100.05	BC
6	Perry	Alabama	6000-1000	Archaic	98			BC - Atchaic woodland and mississippian
9	Carrier Mills	Illinois	6000-1000	Middle Archaic	154	1.001	0.65	BC
7	Callo de oso	Texas	6000-1000		68	11	16.1765	BC
13	Port au Choix	Newfoundland	6000-1000	Late Archaic	149			BC
12	Duke Point	British Columbia	6000-1000	3490BP	10	6	60	BC
11	Forneys cove (ScrI-3)	California	6000-1000	4500-2400BC	61	2.001	3.28033	BC, number of tibiae
19	Eva II component	Tennessee	6000-1000	5000-3000BC	99	2.001	2.02121	BC
19	Ledbetter landing	Tennessee	6000-1000	Archaic (8000-2000BC)	36	1	2.77778	BC

## Sheet: Tuberculosis
Reference	Geographic location	Date	total cases	sample size	Calculated prevalence
Northern and Central Europe
	Zlota, Poland	5000 BCE	1	218	0.458716
(Steinbock, 1976)	Heidelberg, Germany	5000 BCE
(Roberts and Buikstra, 2003)	Manych, Russia	1000 BCE
(Mays and Taylor, 2003)	Tarrant Hinton, England	400-230 BCE	1	15	6.66667
(Roberts and Buikstra, 2003)	Igrzyczna, Poland	450-100 BCE	1	21	4.7619
(Roberts and Buikstra, 2003)	Alsted, Denmark	500-1 BCE
(Jankauskas, 1998)	Marvelė, Lithuania	100-200
(Anderson, 2001)	Towcester, England	100-300	1	27	3.7037
(Stirland and Waldron, 1990)	Alington Ave., England	100-300	2	58	3.44828
(Roberts and Buikstra, 2003)	Alington Ave., England	100-300	2	58	3.44828
(Roberts and Buikstra, 2003)	Ancaster, England	100-300	2	2	100
(Roberts and Buikstra, 2003)	Ancaster, England	100-300	2	2	100
(Stirland and Waldron, 1990)	Ashton, England	100-300	2	297	0.673401
(Stirland and Waldron, 1990)	Ashton, England	100-300	2	297	0.673401
(Roberts and Buikstra, 2003)	Cirencester, England	100-300	5	362	1.38122
(Roberts and Buikstra, 2003)	Cirencester, England	100-300	5	362	1.38122
(Roberts and Buikstra, 2003)	Cirencester, England	100-300	5	362	1.38122
(Roberts and Buikstra, 2003)	Cirencester, England	100-300	5	362	1.38122
(Roberts and Buikstra, 2003)	Queensford Mill, England	100-300	1	81	1.23457
(Roberts and Buikstra, 2003)	Tolpuddle Hall, England	100-300	1	48	2.08333
(Roberts and Buikstra, 2003)	Victoria Rd., England	100-300	1	201	0.497512
(Jankauskas, 1998)	Veršvai, Lithuania	200-300
(Jankauskas, 1998)	Veršvai, Lithuania	200-300
(Wells, 1964)	West Hall, England	330-350	1	7	14.2857
(Jankauskas, 1998)	Plinkaigalis, Lithuania	400-500
(Jankauskas, 1998)	Obeliai, Lithuania	400-500
(Jankauskas, 1998)	Pagrybis, Lithuania	400-500
(Roberts and Buikstra, 2003)	Vaud, Switzerland	400-600
(Évinger et al., 2011)	Szekszárd-Tószegi dűlő, Hungary	500-600	1	1384	0.0722543
(Marcsik et al., 2006)	Kiskundorozsma-Daruhalom, Hungary	600-700		94	0
(Marcsik et al., 1999)	Sükösd, Hungary	600-700		363	0
(Pálfi, 1991)	Bélmegyer-Csömöki, Hungary	600-700	2	239	0.83682
(Pálfi and Marcsik, 1999)	Bélmegyer, Hungary	600-700		239	0
(Molnár et al., 1998)	Pitvaros, Hungary	600-700		209	0
(Molnár et al., 1998)	Pitvaros, Hungary	600-700		209	0
(Pálfi et al., 1999)	Pitvaros, Hungary	600-700		209	0
(Pálfi and Marcsik, 1999)	Bélmegyer, Hungary	600-700		239	0
(Pálfi and Marcsik, 1999)	Szeged-Makkoserdo, Hungary	600-700		152	0
(Pálfi and Marcsik, 1999)	Szeged-Makkoserdo, Hungary	600-700		152	0
(Marcsik and Pálfi, 1993)	Szeged-Makkoserdo, Hungary	600-700		152	0
(Pálfi and Marcsik, 1999)	Csólyospálos, Hungary	600-700		244	0
(Pálfi and Marcsik, 1999)	Székkutas, Hungary	600-700		518	0
(Pálfi and Marcsik, 1999)	Székkutas, Hungary	600-700		518	0
(Pálfi and Marcsik, 1999)	Székkutas, Hungary	600-700		518	0
(Pálfi and Marcsik, 1999)	Hetényegyháza, Hungary	600-700		263	0
(Pálfi and Marcsik, 1999)	Sükösd cemetery, Hungary	600-700		363	0
(Pálfi and Marcsik, 1999)	Sükösd cemetery, Hungary	600-700		363	0
(Roberts and Buikstra, 2003)	Avar period, Hungary	600-700
(Molnár et al., 1998)	Mélykút, Hungary	600-700	1	45	2.22222
(Ulrich-Bochsler et al., 1982)	Oberwil Kirche, Switzerland	600-800	1	28	3.57143
(Roberts and Buikstra, 2003)	Walkringen, Switzerland	600-900	1	20	5
(Marcsik et al., 2006)	Felgyõ-Ürmös tanya, Hungary	700-800		64	0
(Marcsik et al., 2006)	Orosháza-Béke tsz, Hungary	700-800		98	0
(Marcsik et al., 2006)	Ároktõ-Csík gát, Hungary	700-800		228	0
(Marcsik et al., 2006)	Ároktõ-Csík gát, Hungary	700-800		228	0
(Jankauskas, 1998)	Šukioniai, Lithuania	700-800
(Roberts and Buikstra, 2003)	Whithorn, Scotland	>600	3	59	5.08475
(Roberts and Buikstra, 2003)	Whithorn, Scotland	>600	3	59	5.08475
(Roberts and Buikstra, 2003)	Whithorn, Scotland	>600	3	59	5.08475
(Roberts and Buikstra, 2003)	Saltovo-Mayatsk culture, Russia	800-900	1	330	0.30303
(Évinger et al., 2011)	Zalavár-Vársziget-Hadrianus templom, Hungary	800-900	3	381	0.787402
(Évinger et al., 2011)	Zalavár-Vársziget-Hadrianus templom, Hungary	800-900	3	381	0.787402
(Évinger et al., 2011)	Zalavár-Vársziget-Hadrianus templom, Hungary	800-900	3	381	0.787402
(Acsádi et al., 1962)	Zalavár Castle, Hungary	800-1000	2	744	0.268817
(Byock et al., 2005)	Kirkjuhóll, Iceland	1000	1	14	7.14286
(Gernaey et al., 2001)	Addingham, England	1000	1	30	3.33333
(Marcsik et al., 2006)	Magyarhomoróg-Kónyadomb, Hungary	900-1100		368	0
(Roberts and Buikstra, 2003)	Sarkel-Belaya Vezha, Russia	900-1100
(Mays et al., 2001)	Wharram Percy, England	890-1160	9	687	1.31004
(Mays et al., 2001)	Wharram Percy, England	890-1170	9	687	1.31004
(Roberts and Buikstra, 2003)	Mlodzikowo, Poland	900-1200		101	0
(Marcsik et al., 2006)	Derekegyháza-Ibolyás domb, Hungary	1000-1200		56	0
(Pálfi and Marcsik, 1999)	Szegvár-Oromdülo, Hungary	1000-1200		259	0
(Pálfi and Marcsik, 1999)	Püspökladány, Hungary	1000-1200		371	0
(Pálfi and Marcsik, 1999)	Bátmonostor, Hungary	1000-1200		85	0
(Pálfi and Marcsik, 1999)	Csongrád-Felgyö, Hungary	1000-1200		38	0
(Pálfi and Marcsik, 1999)	Hajdúdorog, Hungary	1000-1200		612	0
(Mark et al., 2010)	Csongrád-Ellés, Hungary	1000-1200
(Roberts and Buikstra, 2003)	Czersk, Poland	1000-1200		620	0
(Évinger et al., 2011)	Zalavár-Vársziget-Kápolna, Hungary	1000-1200	3	263	1.14068
(Évinger et al., 2011)	Zalavár-Vársziget-Kápolna, Hungary	1000-1200	3	263	1.14068
(Évinger et al., 2011)	Zalavár-Vársziget-Kápolna, Hungary	1000-1200	3	263	1.14068
(Mays et al., 2001)	Wharram Percy, England	1060-1170	9	687	1.31004
(Mays et al., 2001)	Wharram Percy, England	1060-1170	9	687	1.31004
(Roberts and Buikstra, 2003)	Alton, England	1000-1300	1	41	2.43902
(Roberts and Buikstra, 2003)	Bedhampton, England	1000-1300	2	87	2.29885
(Roberts and Buikstra, 2003)	Bedhampton, England	1000-1300	2	87	2.29885
(Roberts and Buikstra, 2003)	Binchester, England	1000-1300	1	54	1.85185
(Roberts and Buikstra, 2003)	Butler's field, England	1000-1300	1	219	0.456621
(Roberts and Buikstra, 2003)	Cannington, England	1000-1300	2	348	0.574713
(Roberts and Buikstra, 2003)	Cannington, England	1000-1300	2	2	100
(Roberts and Buikstra, 2003)	Edix Hill, England	1000-1300	1	148	0.675676
(Roberts and Buikstra, 2003)	Great Chesterford, England	1000-1300	1	167	0.598802
(Roberts and Buikstra, 2003)	Nazeingbury, England	1000-1300	2	153	1.30719
(Roberts and Buikstra, 2003)	Nazeingbury, England	1000-1300	2	153	1.30719
(Roberts and Buikstra, 2003)	Raunds, England	1000-1300	1	356	0.280899
(Roberts and Buikstra, 2003)	School St., England	1000-1300	2	95	2.10526
(Roberts and Buikstra, 2003)	School St., England	1000-1300	2	95	2.10526
(Roberts and Buikstra, 2003)	South Acre, England	1000-1300	1	116	0.862069
(Mays et al., 2001)	Wharram Percy, England	900-1400	9	687	1.31004
(Mays et al., 2001)	Wharram Percy, England	900-1400	9	687	1.31004
(Mays et al., 2001)	Wharram Percy, England	900-1400	9	687	1.31004
(Marcsik et al., 2006)	Nagylak-Határsáv, Hungary	1100-1200		243	0
(Marcsik et al., 2006)	Nagylak-Határsáv, Hungary	1100-1200		243	0
(Roberts and Buikstra, 2003)	Šwieck, Poland	1100-1200	1	506	0.197628
(Roberts and Buikstra, 2003)	Bedzin, Poland	1100-1200
(Weber et al., 2004)	Stuttgart, Germany	1100-1300		3200	0
(Marcsik et al., 2006)	Nyárlõrinc-Hangár út, Hungary	1100-1300		483	0
(Roberts and Buikstra, 2003)	Czarna Wielka, Poland	1100-1300	4	250	1.6
(Roberts and Buikstra, 2003)	Czarna Wielka, Poland	1100-1300	4	250	1.6
(Roberts and Buikstra, 2003)	Czarna Wielka, Poland	1100-1300	4	250	1.6
(Donoghue and Spigelman, 2008)	Saint Stephen’s Basilica, Székesfehérvár, Hungary	1000-1600	3	935	0.320856
(Donoghue and Spigelman, 2008)	Saint Stephen’s Basilica, Székesfehérvár, Hungary	1000-1600	3	935	0.320856
(Donoghue and Spigelman, 2008)	Saint Stephen’s Basilica, Székesfehérvár, Hungary	1000-1600	3	935	0.320856
(Roberts and Buikstra, 2003)	Olbin, Poland	1200-1300	1
(Spigelman and Lemma, 1993)	England	1000-1600
(Mays et al., 2001)	Wharram Percy, England	900-1700	9	687	1.31004
(Roberts and Buikstra, 2003)	Sypniewo, Poland	1200-1400	1	160	0.625
(Mays et al., 2001)	Wharram Percy, England	1279-1410	9	687	1.31004
(Roberts and Buikstra, 2003)	Oude en Nieuwe Gasthuis, Netherlands	1265-1433	1	52	1.92308
(Roberts and Buikstra, 2003)	Waszawa, Poland	1200-1500	1	93	1.07527
(Roberts and Buikstra, 2003)	Skrwilno, Poland	1200-1500	1	310	0.322581
(Roberts and Buikstra, 2003)	Nänikon, Switzerland	1300-1400
(Roberts and Buikstra, 2003)	Nänikon, Switzerland	1300-1400
(Roberts and Buikstra, 2003)	Battle of Wisby cemetery, Sweden	1361	4	1185	0.337553
(Roberts and Buikstra, 2003)	Battle of Wisby cemetery, Sweden	1361	4	1185	0.337553
(Roberts and Buikstra, 2003)	Whithorn, Scotland	1300-1450	4	1553	0.257566
(Roberts and Buikstra, 2003)	Whithorn, Scotland	1300-1450
(Jankauskas, 1998)	Diktarai, Lithuania	1300-1500
(Faerman et al., 1997)	Kražiai, Lithuania	1400-1500
(Horáčková et al., 1999)	Kŕtiny, Czech Republic	1200-1700	2	975	0.205128
(Horáčková et al., 1999)	Kŕtiny, Czech Republic	1200-1700	2	975	0.205128
(Faerman et al., 1997)	Kraziai, Lithuania	1400-1500		18	0
(Pálfi and Marcsik, 1999)	Gerla-Monostor, Hungary	1300-1600		47	0
(Roberts and Buikstra, 2003)	Kecskemét-Ferences, Hungary	1300-1600		323	0
(Roberts and Buikstra, 2003)	Blackfriars Friary, England	1300-1700	2	681	0.293686
(Roberts and Buikstra, 2003)	Chelmsford Dominican Priory, England	1300-1700	1	135	0.740741
(Roberts and Buikstra, 2003)	Chichester, England	1300-1700	8	306	2.61438
(Roberts and Buikstra, 2003)	Chichester, England	1300-1700	8	306	2.61438
(Roberts and Buikstra, 2003)	Chichester, England	1300-1700	8	306	2.61438
(Roberts and Buikstra, 2003)	Chichester, England	1300-1700	8	306	2.61438
(Roberts and Buikstra, 2003)	Hickleton, England	1300-1700	1	68	1.47059
(Roberts and Buikstra, 2003)	Jewbury, England	1300-1700	6	412	1.45631
(Roberts and Buikstra, 2003)	Jewbury, England	1300-1700	6	412	1.45631
(Roberts and Buikstra, 2003)	Jewbury, England	1300-1700	6	412	1.45631
(Roberts and Buikstra, 2003)	Jewbury, England	1300-1700	6	412	1.45631
(Roberts and Buikstra, 2003)	Jewbury, England	1300-1700	6	412	1.45631
(Roberts and Buikstra, 2003)	Jewbury, England	1300-1700	6	412	1.45631
(Roberts and Buikstra, 2003)	St. Andrew, England	1300-1700	5	402	1.24378
(Roberts and Buikstra, 2003)	St. Andrew, England	1300-1700	5	402	1.24378
(Roberts and Buikstra, 2003)	St. Andrew, England	1300-1700	5	402	1.24378
(Roberts and Buikstra, 2003)	St. Andrew, England	1300-1700	5	402	1.24378
(Roberts and Buikstra, 2003)	St. Andrew, England	1300-1700	5	402	1.24378
(Roberts and Buikstra, 2003)	St. Helen-on-the-Walls, England	1300-1700	5	1042	0.479846
(Roberts and Buikstra, 2003)	St. Helen-on-the-Walls, England	1300-1700	5	1042	0.479846
(Roberts and Buikstra, 2003)	St. Helen-on-the-Walls, England	1300-1700	5	1042	0.479846
(Roberts and Buikstra, 2003)	St. Helen-on-the-Walls, England	1300-1700	5	1042	0.479846
(Roberts and Buikstra, 2003)	St. Helen-on-the-Walls, England	1300-1700	5	1042	0.479846
(Roberts and Buikstra, 2003)	St. Oswald's Priory, England	1300-1700	3	487	0.616016
(Roberts and Buikstra, 2003)	St. Oswald's Priory, England	1300-1700	3	487	0.616016
(Roberts and Buikstra, 2003)	St. Oswald's Priory, England	1300-1700	3	487	0.616016
(Roberts and Buikstra, 2003)	Stratford Langthorne, England	1300-1700	1	28	3.57143
(Roberts and Buikstra, 2003)	Thetford, England	1300-1700	2	99	2.0202
(Jankauskas, 1998)	Alytus, Lithuania	1400-1600		1345	0
(Jankauskas, 1998)	Alytus, Lithuania	1400-1600		1345	0
(Jankauskas, 1998)	Alytus, Lithuania	1400-1600		1345	0
(Jankauskas, 1998)	Alytus, Lithuania	1400-1600		1345	0
(Jankauskas, 1998)	Alytus, Lithuania	1400-1600		1345	0
(Jankauskas, 1998)	Alytus, Lithuania	1400-1600		1345	0
(Jankauskas, 1998)	Alytus, Lithuania	1400-1600		1345	0
(Jankauskas, 1998)	Alytus, Lithuania	1400-1600		1345	0
(Jankauskas, 1998)	Alytus, Lithuania	1400-1600		1345	0
(Jankauskas, 1998)	Arglaičiai, Lithuania	1400-1600
(Roberts and Buikstra, 2003)	Farringdon Street, England	1300-1700	4	533	0.750469
(Roberts and Buikstra, 2003)	Farringdon Street, England	1300-1700	4	533	0.750469
(Roberts and Buikstra, 2003)	Farringdon Street, England	1300-1700	4	533	0.750469
(Roberts and Buikstra, 2003)	Farringdon Street, England	1300-1700	4	533	0.750469
(Roberts and Buikstra, 2003)	Royal Mint, England	1300-1700	5	940	0.531915
(Roberts and Buikstra, 2003)	Royal Mint, England	1300-1700	5	940	0.531915
(Roberts and Buikstra, 2003)	Royal Mint, England	1300-1700	5	940	0.531915
(Roberts and Buikstra, 2003)	St. Saviour, England	1300-1700	1	193	0.518135
(Roberts and Buikstra, 2003)	Newcastle infirmary, England	1300-1700	2	210	0.952381
(Roberts and Buikstra, 2003)	Newcastle infirmary, England	1300-1700	2	210	0.952381
(Roberts and Buikstra, 2003)	Ensay, Scotland	1300-1700	5	416	1.20192
(Roberts and Buikstra, 2003)	Ensay, Scotland	1300-1700	5	416	1.20192
(Roberts and Buikstra, 2003)	Ensay, Scotland	1300-1700	5	416	1.20192
(Roberts and Buikstra, 2003)	Ensay, Scotland	1300-1700	5	416	1.20192
(Roberts and Buikstra, 2003)	Ensay, Scotland	1300-1700	5	416	1.20192
(Ôz et al., 2009)	Szeged, Hungary	1350-1713	4	641	0.624025
(Ôz et al., 2009)	Szeged, Hungary	1350-1713	4	641	0.624025
(Ôz et al., 2009)	Szeged, Hungary	1350-1713	4	641	0.624025
(Ôz et al., 2009)	Szeged, Hungary	1350-1713	4	641	0.624025
(Roberts and Buikstra, 2003)	Oude en Nieuwe Gasthuis, Netherlands	1433-1652	1	49	2.04082
(Roberts and Buikstra, 2003)	Gdańsk, Poland	1500-1600	1	44	2.27273
(Merczi, 2001)	Visegrád-Diós, Hungary	1500-1600	1	228	0.438596
(Roberts and Buikstra, 2003)	St. Agnes monastery, Netherlands	1573-1574	1	13	7.69231
(Zink et al., 2005)	Southern Germany	1400-1800		2547	0
(Zink et al., 2005)	Southern Germany	1400-1800		2547	0
(Zink et al., 2005)	Southern Germany	1400-1800		2547	0
(Zink et al., 2005)	Southern Germany	1400-1800		2547	0
(Zink et al., 2005)	Southern Germany	1400-1800		2547	0
(Zink et al., 2005)	Southern Germany	1400-1800		2547	0
(Zink et al., 2005)	Southern Germany	1400-1800		2547	0
(Zink et al., 2005)	Southern Germany	1400-1800		2547	0
(Zink et al., 2005)	Southern Germany	1400-1800		2547	0
(Zink et al., 2005)	Southern Germany	1400-1800		2547	0
(Jankauskas, 1998)	Drǫseikiai, Lithuania	1600
(Molnár et al., 2005)	Bácsalmás cemetery, Hungary	1600-1700	14	173	8.09249
(Molnár et al., 2005)	Bácsalmás cemetery, Hungary	1600-1700	14	173	8.09249
(Molnár et al., 2005)	Bácsalmás cemetery, Hungary	1600-1700	14	173	8.09249
(Molnár et al., 2005)	Bácsalmás cemetery, Hungary	1600-1700	14	173	8.09249
(Molnár et al., 2005)	Bácsalmás cemetery, Hungary	1600-1700	14	173	8.09249
(Pálfi and Marcsik, 1999)	Bácsalmás cemetery, Hungary	1600-1700	14	173	8.09249
(Molnár and Pálfi, 1994)	Bácsalmás-Homokbánya cemetery, Hungary	1600-1700	14	173	8.09249
(Haas et al., 2000)	Bácsalmás cemetery, Hungary	1600-1700	14	173	8.09249
(Molnár and Pálfi, 1994)	Bácsalmás-Homokbánya cemetery, Hungary	1600-1700	14	173	8.09249
(Molnár and Pálfi, 1994)	Bácsalmás-Homokbánya cemetery, Hungary	1600-1700	14	173	8.09249
(Haas et al., 2000)	Bácsalmás cemetery, Hungary	1600-1700	14	173	8.09249
(Haas et al., 2000)	Bácsalmás cemetery, Hungary	1600-1700	14	173	8.09249
(Haas et al., 2000)	Bácsalmás cemetery, Hungary	1600-1700	14	173	8.09249
(Pálfi and Marcsik, 1999)	Bácsalmás cemetery, Hungary	1600-1700	14	173	8.09249
(Jankauskas, 1998)	Didieji Likiškiai, Lithuania	1600-1700
(Roberts and Buikstra, 2003)	Zienki, Poland	1600-1700	1	163	0.613497
(Spigelman and Lemma, 1993)	Scotland	1600-1700
(Horáčková et al., 1999)	Jilhava, Czech Republic	1720	1	5	20
(Évinger et al., 2011)	Zsámbék – Premontrei templom, Hungary	1700-1800	1	394	0.253807
(Bachmann et al., 2008)	Kaiserebersdorf Castle, Austria	1700-1800
(Bachmann et al., 2008)	Kaiserebersdorf Castle, Austria	1700-1800
(Jankauskas, 1998)	Buivydai, Lithuania	1700-1800
(Roberts and Buikstra, 2003)	Bern-Bärengraben, Switzerland	1700-1800
(Bachmann et al., 2008)	Weisbach collection	1800-1900
(Bachmann et al., 2008)	Weisbach collection	1800-1900
(Bachmann et al., 2008)	Weisbach collection	1800-1900
(Ortner 2003)										922		45 both
New World
(Sáez, 2008)	Puqeldon 1, Los Lagos	417-297 BCE	3	22	13.6364
(Sáez, 2008)	Puqeldon 1, Los Lagos	417-297 BCE	3	22	13.6364
(Sáez, 2008)	Puqeldon 1, Los Lagos	417-297 BCE	3	22	13.6364
(Ortner, 2003)	Illinois	400
(Arriaza et al., 1995)	Borders of Atacama Desert, Chile	500	4	483	0.828157
(Arriaza et al., 1995)	Borders of Atacama Desert, Chile	500	4	483	0.828157
(Friedrich et al., 2009)	Laguna de los Cóndores, Peru	500-1000	2	219	0.913242
(Friedrich et al., 2009)	Laguna de los Cóndores, Peru	500-1000	2	219	0.913242
(Ritchie, 1952)	Durkee farm, New York	500-1300
(Ritchie, 1952)	Peter Rapp farm, New York	500-1300
(Ritchie, 1952)	Kipp Island, New York	500-1300
(Lombardi and Caceres, 2000)	Nasca, Peru	900
(Williams and Snortland-Coles, 1986)	Jamestown Mound, Illinois	860-1000	1	75	1.33333
(Morse, 1967)	Nashville, Tennessee	prehistoric
(El-Najjar, 1979)	Chavez Pass, Arizona	900-1100	4
(El-Najjar, 1979)	Chavez Pass, Arizona	900-1100	4
(El-Najjar, 1979)	Chavez Pass, Arizona	900-1100	4
(El-Najjar, 1979)	Chavez Pass, Arizona	900-1100	4
(Arriaza et al., 1995)	Borders of Atacama Desert, Chile	1000	4	483	0.828157
(Klaus et al., 2010)	Illimo, Peru	900-1100		52	0
(Buikstra, 1977)	Schild Cemetery, Illinois	820-1310	14	422	3.31754
(Buikstra, 1977)	Schild Cemetery, Illinois	820-1310	14	422	3.31754
(Buikstra, 1977)	Schild Cemetery, Illinois	820-1310	14	422	3.31754
(Buikstra, 1977)	Schild Cemetery, Illinois	820-1310	14	422	3.31754
(Buikstra, 1977)	Schild Cemetery, Illinois	820-1310	14	422	3.31754
(Buikstra, 1977)	Schild Cemetery, Illinois	820-1310	14	422	3.31754
(Buikstra, 1977)	Schild Cemetery, Illinois	820-1310	14	422	3.31754
(Buikstra, 1977)	Schild Cemetery, Illinois	820-1310	14	422	3.31754
(Buikstra, 1977)	Schild Cemetery, Illinois	820-1310	14	422	3.31754
(Buikstra, 1977)	Schild Cemetery, Illinois	820-1310	14	422	3.31754
(Buikstra, 1977)	Schild Cemetery, Illinois	820-1310	14	422	3.31754
(Raff et al., 2006)	Schild Cemetery, Illinois	1000-1200	14	422	3.31754
(Raff et al., 2006)	Schild Cemetery, Illinois	1000-1200	14	422	3.31754
(Raff et al., 2006)	Schild Cemetery, Illinois	1000-1200	14	422	3.31754
(Etxeberria et al., 2000)	Soacha, Colombia	1100-1300
(Etxeberria et al., 2000)	Soacha, Colombia	1100-1300
(Etxeberria et al., 2000)	Soacha, Colombia	1100-1300
(Etxeberria et al., 2000)	Soacha, Colombia	1100-1300
(Etxeberria et al., 2000)	Soacha, Colombia	1100-1300
(Etxeberria et al., 2000)	Soacha, Colombia	1100-1300
(Buikstra, 1977)	Fulton County, Illinois	1200-1300
(Buikstra, 1977)	Fulton County, Illinois	1200-1300
(Etxeberria et al., 2000)	Valle del Cauca, Colombia	1000-1500
(Martinez et al., 2010)	Sátivanorte, Colombia	1200-1300
(Pfeiffer, 1984)	Ontario	1275
(Buikstra, 1977)	Turpin Site, Ohio	1125-1425
(Buikstra, 1977)	Turpin Site, Ohio	1125-1425
(Buikstra, 1977)	Turpin Site, Ohio	1125-1425
(Lichtor and Lichtor, 1957)	Clarksville, Tennessee	1200-1400
(Powell, 1987)	Irene Mound, Georgia	1150-1450	10	176	5.68182
(Powell, 1987)	Irene Mound, Georgia	1150-1450	10	176	5.68182
(Powell, 1987)	Irene Mound, Georgia	1150-1450	10	176	5.68182
(Powell, 1987)	Irene Mound, Georgia	1150-1450	10	176	5.68182
(Powell, 1987)	Irene Mound, Georgia	1150-1450	10	176	5.68182
(Powell, 1987)	Irene Mound, Georgia	1150-1450	10	176	5.68182
(Powell, 1987)	Irene Mound, Georgia	1150-1450	10	176	5.68182
(Powell, 1987)	Irene Mound, Georgia	1150-1450	10	176	5.68182
(Morse, 1967)	Memphis, Tennessee	1027-1617
(Buikstra, 1977)	Fulton County, Illinois	1130-1530
(Buikstra, 1977)	Fulton County, Illinois	1150-1550
(Perzigian and Widmer, 1979)	Ohio	950-1750
(Perzigian and Widmer, 1979)	Ohio	950-1750
(Perzigian and Widmer, 1979)	Ohio	950-1750
(Perzigian and Widmer, 1979)	Ohio	950-1750
(Perzigian and Widmer, 1979)	Ohio	950-1750
(Perzigian and Widmer, 1979)	Ohio	950-1750
(Buikstra, 1988)	Estuquina, Peru	1350	13	414	3.1401
(Buikstra, 1988)	Estuquina, Peru	1350	13	414	3.1401
(Buikstra, 1988)	Estuquina, Peru	1350	13	414	3.1401
(Buikstra, 1988)	Estuquina, Peru	1350	13	414	3.1401
(Buikstra, 1988)	Estuquina, Peru	1350	13	414	3.1401
(Buikstra, 1988)	Estuquina, Peru	1350	13	414	3.1401
(Buikstra, 1988)	Estuquina, Peru	1350	13	414	3.1401
(Buikstra, 1988)	Estuquina, Peru	1350	13	414	3.1401
(Buikstra, 1988)	Estuquina, Peru	1350	13	414	3.1401
(Buikstra, 1988)	Estuquina, Peru	1350	13	414	3.1401
(Buikstra, 1988)	Estuquina, Peru	1350	13	414	3.1401
(Buikstra, 1988)	Estuquina, Peru	1350	13	414	3.1401
(Buikstra, 1988)	Estuquina, Peru	1350	13	414	3.1401
(Buikstra, 1977)	Bennet Site, Canada	1300-1400
(Buikstra, 1977)	Fairty Ossuary, Canada	1400
(Etxeberria et al., 2000)	Marin, Boyacá, Colombia	<1500
(Etxeberria et al., 2000)	Incan site, Peru	<1500
(Etxeberria et al., 2000)	Guane, Colombia	<1500
(Klaus et al., 2010)	La Caleta de San José, Peru	1375-1450		26	0
(Klaus et al., 2010)	La Caleta de San José, Peru	1375-1450		26	0
(Buikstra, 1977)	Fulton County, Illinois	1220-1620
(Braun et al., 1998)	Uxbridge Ossuary, Ontario	1410-1483
(Lahr and Bowman, 1992)	Kechipawan, New Mexico	1300-1600	3	54	5.55556
(Hogue, 2007)	Lyon's Bluff	1280-1690	2	74	2.7027
(Hogue, 2007)	Lyon's Bluff	1280-1690	2	74	2.7027
(Pfeiffer, 1984)	Uxbridge Ossuary, Ontario	1490	26	457	5.68928
(Pfeiffer, 1984)	Uxbridge Ossuary, Ontario	1490	26	457	5.68928
(Pfeiffer, 1984)	Uxbridge Ossuary, Ontario	1490	26	457	5.68928
(Pfeiffer, 1984)	Uxbridge Ossuary, Ontario	1490	26	457	5.68928
(Pfeiffer, 1984)	Uxbridge Ossuary, Ontario	1490	26	457	5.68928
(Pfeiffer, 1984)	Uxbridge Ossuary, Ontario	1490	26	457	5.68928
(Pfeiffer, 1984)	Uxbridge Ossuary, Ontario	1490	26	457	5.68928
(Pfeiffer, 1984)	Uxbridge Ossuary, Ontario	1490	26	457	5.68928
(Gerszten et al., 2001)	South America	1500
(Kim, 2011)	Anse Sainte-Marguerite, Guadeloupe	Colonial	15	148	10.1351
(Dutour et al., 2001)	Anse Sainte-Marguerite, Guadeloupe	Colonial	15	148	10.1351
(Dutour et al., 2001)	Anse Sainte-Marguerite, Guadeloupe	Colonial	15	148	10.1351
(Dutour et al., 2001)	Anse Sainte-Marguerite, Guadeloupe	Colonial	15	148	10.1351
(Dutour et al., 2001)	Anse Sainte-Marguerite, Guadeloupe	Colonial	15	148	10.1351
(Dutour et al., 2001)	Anse Sainte-Marguerite, Guadeloupe	Colonial	15	148	10.1351
(Dutour et al., 2001)	Anse Sainte-Marguerite, Guadeloupe	Colonial	15	148	10.1351
(Dutour et al., 2001)	Anse Sainte-Marguerite, Guadeloupe	Colonial	15	148	10.1351
(Dutour et al., 2001)	Anse Sainte-Marguerite, Guadeloupe	Colonial	15	148	10.1351
(Dutour et al., 2001)	Anse Sainte-Marguerite, Guadeloupe	Colonial	15	148	10.1351
(Dutour et al., 2001)	Anse Sainte-Marguerite, Guadeloupe	Colonial	15	148	10.1351
(Dutour et al., 2001)	Anse Sainte-Marguerite, Guadeloupe	Colonial	15	148	10.1351
(Dutour et al., 2001)	Anse Sainte-Marguerite, Guadeloupe	Colonial	15	148	10.1351
(Dutour et al., 2001)	Anse Sainte-Marguerite, Guadeloupe	Colonial	15	148	10.1351
(Aceves-Avila et al., 1998)	Hospital Real de San Jose de los Naturales, Mexico	1500-1600	19	443	4.28894
(Aceves-Avila et al., 1998)	Hospital Real de San Jose de los Naturales, Mexico	1500-1600	19	443	4.28894
(Aceves-Avila et al., 1998)	Hospital Real de San Jose de los Naturales, Mexico	1500-1600	19	443	4.28894
(Aceves-Avila et al., 1998)	Hospital Real de San Jose de los Naturales, Mexico	1500-1600	19	443	4.28894
(Aceves-Avila et al., 1998)	Hospital Real de San Jose de los Naturales, Mexico	1500-1600	19	443	4.28894
(Aceves-Avila et al., 1998)	Hospital Real de San Jose de los Naturales, Mexico	1500-1600	19	443	4.28894
(Aceves-Avila et al., 1998)	Hospital Real de San Jose de los Naturales, Mexico	1500-1600	19	443	4.28894
(Aceves-Avila et al., 1998)	Hospital Real de San Jose de los Naturales, Mexico	1500-1600	19	443	4.28894
(Aceves-Avila et al., 1998)	Hospital Real de San Jose de los Naturales, Mexico	1500-1600	19	443	4.28894
(Aceves-Avila et al., 1998)	Hospital Real de San Jose de los Naturales, Mexico	1500-1600	19	443	4.28894
(Aceves-Avila et al., 1998)	Hospital Real de San Jose de los Naturales, Mexico	1500-1600	19	443	4.28894
(Aceves-Avila et al., 1998)	Hospital Real de San Jose de los Naturales, Mexico	1500-1600	19	443	4.28894
(Aceves-Avila et al., 1998)	Hospital Real de San Jose de los Naturales, Mexico	1500-1600	19	443	4.28894
(Aceves-Avila et al., 1998)	Hospital Real de San Jose de los Naturales, Mexico	1500-1600	19	443	4.28894
(Aceves-Avila et al., 1998)	Hospital Real de San Jose de los Naturales, Mexico	1500-1600	19	443	4.28894
(Aceves-Avila et al., 1998)	Hospital Real de San Jose de los Naturales, Mexico	1500-1600	19	443	4.28894
(Aceves-Avila et al., 1998)	Hospital Real de San Jose de los Naturales, Mexico	1500-1600	19	443	4.28894
(Aceves-Avila et al., 1998)	Hospital Real de San Jose de los Naturales, Mexico	1500-1600	19	443	4.28894
(Aceves-Avila et al., 1998)	Hospital Real de San Jose de los Naturales, Mexico	1500-1600	19	443	4.28894
(Ortner, 2003)	Pecos Pueblo, New Mexico	1300-1838
(Ortner, 2003)	Yukon River, Alaska	<1630	1
(Buikstra, 1976)	Hudson Bay, Canada	<1700	3	28	10.7143
(Buikstra, 1976)	Hudson Bay, Canada	<1700	3	28	10.7143
(Buikstra, 1976)	Hudson Bay, Canada	<1700	3	28	10.7143
(Klaus et al., 2010)	Chapel of San Pedro de Mórrope, Peru	1539-1750		870	0
(Hogue, 2007)	Protohistoric sites near Mississippi	1400-1900	1	85	1.17647
(Lambert, 2006)	Eaton's Estate, North Carolina	1830-1850	3	17	17.6471
(Lambert, 2006)	Eaton's Estate, North Carolina	1830-1850	3	17	17.6471
(Lambert, 2006)	Eaton's Estate, North Carolina	1830-1850	3	17	17.6471
(Wescott et al., 2010)	Lexington, Missouri	1854
(Kelley and El-Najjar, 1980)	Hamann-Todd collection	1853-1938		3100	0
(Kelley and El-Najjar, 1980)	Hamann-Todd collection	1853-1938		3100	0
(Kelley and El-Najjar, 1980)	Hamann-Todd collection	1853-1938		3100	0
(Kelley and El-Najjar, 1980)	Hamann-Todd collection	1853-1938		3100	0
(Kelley and El-Najjar, 1980)	Hamann-Todd collection	1853-1938		3100	0
(Kelley and El-Najjar, 1980)	Hamann-Todd collection	1853-1938		3100	0
(Kelley and El-Najjar, 1980)	Hamann-Todd collection	1853-1938		3100	0
(Kelley and El-Najjar, 1980)	Hamann-Todd collection	1853-1938		3100	0
(Kelley and El-Najjar, 1980)	Hamann-Todd collection	1853-1938		3100	0
(Kelley and El-Najjar, 1980)	Hamann-Todd collection	1853-1938		3100	0
(Kelley and El-Najjar, 1980)	Hamann-Todd collection	1853-1938		3100	0
(Kelley and El-Najjar, 1980)	Hamann-Todd collection	1853-1938		3100	0
(Kelley and El-Najjar, 1980)	Hamann-Todd collection	1853-1938		3100	0
(Kelley and El-Najjar, 1980)	Hamann-Todd collection	1853-1938		3100	0
(Kelley and El-Najjar, 1980)	Hamann-Todd collection	1853-1938		3100	0
(Kelley and El-Najjar, 1980)	Hamann-Todd collection	1853-1938		3100	0
(Kelley and El-Najjar, 1980)	Hamann-Todd collection	1853-1938		3100	0
(Kelley and El-Najjar, 1980)	Hamann-Todd collection	1853-1938		3100	0
(Kelley and El-Najjar, 1980)	Hamann-Todd collection	1853-1938		3100	0
(Kelley and El-Najjar, 1980)	Hamann-Todd collection	1853-1938		3100	0
(Kelley and El-Najjar, 1980)	Hamann-Todd collection	1853-1938		3100	0
(Kelley and El-Najjar, 1980)	Hamann-Todd collection	1853-1938		3100	0
(Kelley and El-Najjar, 1980)	Hamann-Todd collection	1853-1938		3100	0
(Kelley and El-Najjar, 1980)	Hamann-Todd collection	1853-1938		3100	0
(Kelley and El-Najjar, 1980)	Hamann-Todd collection	1853-1938		3100	0
(Kelley and El-Najjar, 1980)	Hamann-Todd collection	1853-1938		3100	0
Asia
(Douglas, 1996)	Non Nok Tha, Thailand	2500-2000 BCE	5	180	2.77778
(Douglas, 1996)	Non Nok Tha, Thailand	2000-1000 BCE	5	180	2.77778
(Douglas, 1996)	Non Nok Tha, Thailand	2000-1000 BCE	5	180	2.77778
(Douglas, 1996)	Non Nok Tha, Thailand	1000 BCE	5	180	2.77778
(Douglas, 1996)	Non Nok Tha, Thailand	1000 BCE	5	180	2.77778
(Suzuki and Inoue, 2007)	Aoyakamijichi, Japan	454 BCE-124		109	0
(Suzuki and Inoue, 2007)	Aoyakamijichi, Japan	454 BCE-124		109	0
(Roberts and Buikstra, 2003)	Issyk-Kul Lake, former Soviet Union	1000 BCE to 700 CE
(Suzuki et al., 2008)	Nukdo site, Korea	100 BCE-0		200	0
(Roberts and Buikstra, 2003)	Biisk, Siberia	100 BCE to 0
(Murphy et al., 2009)	Aymyrlyg, Tyva, Siberia	300 BCE-300	9	202	4.45545
(Murphy et al., 2009)	Aymyrlyg, Tyva, Siberia	300 BCE-300	9	202	4.45545
(Murphy et al., 2009)	Aymyrlyg, Tyva, Siberia	300 BCE-300	9	202	4.45545
(Murphy et al., 2009)	Aymyrlyg, Tyva, Siberia	300 BCE-300	9	202	4.45545
(Murphy et al., 2009)	Aymyrlyg, Tyva, Siberia	300 BCE-300	9	202	4.45545
(Tayles and Buckley, 2004)	Noen U-Loke site, Thailand	0-200	1	89	1.1236
(Roberts and Buikstra, 2003)	Kobyakovo, Russia	200-300
(Roberts and Buikstra, 2003)	Jyoyama, Japan	300-700
(Roberts and Buikstra, 2003)	Unoki, Japan	300-700
(Roberts and Buikstra, 2003)	Asahi-Dai, Japan	300-700
(Ortner, 2003)	Unoki, Japan	300-700
(Spigelman and Lemma, 1993)	Borneo	<600
(Roberts and Buikstra, 2003)	Saragash, Siberia	1000-1100
(Roberts and Buikstra, 2003)	Ainu, Japan	1600-1900
(Roberts and Buikstra, 2003)	Kakako	1853-1854
Mediterranean
(Al-Sarie et al., 1996)	'Ain Ghazal, Jordan	7250 BCE	3	75	4
(Al-Sarie et al., 1996)	'Ain Ghazal, Jordan	7250 BCE	3	75	4
(Al-Sarie et al., 1996)	'Ain Ghazal, Jordan	7250 BCE	3	75	4
(Hershkovitz et al., 2008)	Atlit-Yam site, Mediterranean	7250-6160 BCE
(Canci et al., 1996)	Arma dell'Aquila cave, Italy	5800 BCE
(Roberts and Buikstra, 2003)	Neolithic cave, Spain	5000-4000 BCE
(Formicola et al., 1987)	Arene Candide cave, Liguria, Italy	4000-3500 BCE	1	13	7.69231
(Morse, 1967)	Sakkara, Egypt	3300 BCE
(Zink et al., 2003)	Abydos, Egypt	3500-2650 BCE		250	0
(Zink et al., 2001)	Abydos, Egypt	3500-2650		250	0
(Zink et al., 2001)	Abydos, Egypt	3500-2650		250	0
(Morse, 1967)	Nubia, Egypt	3000 BCE
(Morse, 1967)	Nubia, Egypt	3000 BCE
(Morse, 1967)	Nubia, Egypt	3000 BCE
(Morse, 1967)	Nubia, Egypt	3000 BCE
(Morse, 1967)	Nubia, Egypt	3000 BCE
(Morse, 1967)	Nagada, Egypt	4500-1069 BCE
(Morse, 1967)	Nagada, Egypt	4500-1069 BCE
(Morse, 1967)	Nagada, Egypt	4500-1069 BCE
(Morse, 1967)	Nagada, Egypt	4500-1069 BCE
(Morse, 1967)	Nagada, Egypt	4500-1069 BCE
(Morse, 1967)	Nagada, Egypt	4500-1069 BCE
(Morse, 1967)	Nagada, Egypt	4500-1069 BCE
(Ortner, 1979)	Bab edh-Dhra, Jordan	3150-2200 BCE	2	92	2.17391
(Morse, 1967)	Nubia, Egypt	2000 BCE
(Malnasi, 2005)	Dayr Al-Barshā, Egypt	2050–1750 BCE	1	57	1.75439
(Morse, 1967)	Nubia, Egypt	2050-1700 BCE
(Morse, 1967)	Nubia, Egypt	2050-1700 BCE
(Morse, 1967)	Nubia, Egypt	2050-1700 BCE
(Morse, 1967)	Nubia, Egypt	2050-1700 BCE
(Morse, 1967)	Nubia, Egypt	2050-1700 BCE
(Zink et al., 2001)	Thebes-West, Egypt	2050-1650 BCE
(Zink et al., 2001)	Thebes-West, Egypt	2050-1650 BCE
(Zink et al., 2003)	Thebes-West, Egypt	2100-1550 BCE		183	0
(Zink et al., 2003)	Thebes-West, Egypt	2100-1550 BCE		183	0
(Zink et al., 2003)	Thebes-West, Egypt	2100-1550 BCE		183	0
(Roberts and Buikstra, 2003)	Madonna di Loreto, Italy	1700-1500 BCE
(Roberts and Buikstra, 2003)	Olmo do Nogara, Italy	1700-1500 BCE
(Roberts and Buikstra, 2003)	Nubia, Egypt	1500 BCE
(Zink et al., 2001)	Thebes-West, Egypt	1450-1250 BCE		620	0
(Zink et al., 2001)	Thebes-West, Egypt	1450-1250 BCE		620	0
(Zink et al., 2001)	Thebes-West, Egypt	1450-1250 BCE		620	0
(Zink et al., 2005)	Thebes-West, Egypt	1450-1250 BCE		620	0
(Zink et al., 2005)	Thebes-West, Egypt	1450-1250 BCE		620	0
(Zink et al., 2001)	Thebes-West, Egypt	1450-1250 BCE		620	0
(Zink et al., 2005)	Thebes-West, Egypt	1450-1250 BCE
(Zink et al., 2005)	Thebes-West, Egypt	1450-1250 BCE
(Zink et al., 2001)	Thebes-West, Egypt	1550-1080 BCE
(Zink et al., 2001)	Thebes-West, Egypt	1550-1080 BCE
(Zink et al., 2001)	Thebes-West, Egypt	1550-1080 BCE
(Zink et al., 2001)	Thebes-West, Egypt	1550-1080 BCE
(Zink et al., 2001)	Thebes-West, Egypt	1550-1080 BCE
(Zink et al., 2001)	Thebes-West, Egypt	1550-1080 BCE
(Zink et al., 2001)	Thebes-West, Egypt	1550-1080 BCE
(Zink et al., 2003)	Thebes-West, Egypt	1550-1080 BCE
(Nerlich et al., 1997)	Thebes-West, Egypt	1550-1080 BCE
(Strouhal, 1995)	Serra 400, Nubia, Egypt	1550-1070 BCE
(Brier, 2004)	Egypt	1085-945 BCE
(Ortner, 2003)	Egypt	1000 BCE
(Roberts and Buikstra, 2003)	Oliena-Nuoro, Sardinia	1000-300 BCE
(Littleton, 2003)	Bahrain, Denmark	300 BCE-250 CE	2	17	11.7647
(Littleton, 2003)	Bahrain, Denmark	300 BCE-250 CE	2	17	11.7647
(Matheson et al., 2009)	Tomb of the Shroud, Jerusalem	0-100	3	11	27.2727
Henneberg and Henneberg	Pompeii, Italy	79 CE	2	500	0.4
Henneberg and Henneberg	Pompeii, Italy	79 CE	2	500	0.4
(Roberts and Buikstra, 2003)	Saraçhane, Istanbul	300-600	3	250	1.2
(Roberts and Buikstra, 2003)	Saraçhane, Istanbul	300-600	3	250	1.2
(Spigelman and Lemma, 1993)	Turkey	300-600
(Molnár et al., 1998)	St.-Martin-de-Cadillan, France	400-600
(Molnár et al., 1998)	Porte d'Orée, France	600-700	1	8	12.5
(Strouhal, 1995)	Nubia, Egypt	350-1500
(Roberts and Buikstra, 2003)	Santa Cristòfol de la Castanya, Spain	1100-1200
(Molnár et al., 1998)	La Roquebrussanne, France	1100-1200
(Roberts and Buikstra, 2003)	Abbaye de la Celle, France	1100-1200	25	80	31.25
(Roberts and Buikstra, 2003)	Santa Maria del Hito, Spain	1300-1500
(Roberts and Buikstra, 2003)	Santa Maria Ripoll, Spain	1300-1400
(Giuffra et al., 2009)	Florence, Italy	1595-1666
(Roberts and Buikstra, 2003)	Santa Eulalia de Riuprimer, Spain	1600-1800
(Campbell and Ackermann, 2010)	Makgope, South Africa	1682-1745	5	947	0.527983
(Roberts and Buikstra, 2003)	L'Observance Series, France	1722	1	216	0.462963
(Campbell and Ackermann, 2010)	Henkries, South Africa	1652-1911	5	947	0.527983
(Campbell and Ackermann, 2010)	Cape Town, South Africa	1755-1827	5	947	0.527983
(Campbell and Ackermann, 2010)	Cape Town, South Africa	1755-1827	5	947	0.527983
(Campbell and Ackermann, 2010)	Gladstone cemetery, South Africa	1897-1900	5	947	0.527983

## Sheet: Leprosy
Midpoint date	Num cases	total sample	Rep preva	Calc Prev
-3215	2	48	4.17	4.16667
-2150	1	4	25	25
-2000	1	5	20	20
-350	1	94	1.06	1.06383
-150	6	500	1.2	1.2
-150	4	71	5.63	5.6338
0.01	1	4	25	25
50	1	11	9.09	9.09091
75	2	120	1.67	1.66667
133	1	412	0.24	0.242718
250	1	15	6.67	6.66667
350	1	1200	0.08	0.0833333
475	3	54	5.56	5.55556
478	17	110	16.2	15.4545
500	1	131	0.763	0.763359
500	1	100	1	1
550	1	149	0.67	0.671141
575	1	85	1.18	1.17647
600	2	107	1.87	1.86916
663	3	130	2.31	2.30769
675	8	94	8.51	8.51064
700	2	15	13.33	13.3333
700	1	248	0.4	0.403226
750	1	145	0.6897	0.689655
750	2	252	0.79	0.793651
763	1	423	0.24	0.236407
783	3	191	1.57	1.57068
800	4	36	11.11	11.1111
800	2	4	50	50
825	1	199	0.5	0.502513
838	1	327	0.3058	0.30581
900	1	330	0.3	0.30303
950	2	264	0.76	0.757576
950	4	629	0.64	0.63593
950	1	63	1.59	1.5873
950	1	79	1.27	1.26582
950	28	181	15.47	15.4696
975	3	128	2.34	2.34375
1010	7	265	2.642	2.64151
1030	1	687	0.15	0.14556
1043	33	38	86.84	86.8421
1050	6	700	0.86	0.857143
1050	2	105	1.91	1.90476
1050	1	3	33.33	33.3333
1050	15	34	0.46	44.1176
1050	38	108	0.36	35.1852
1065	27	756	3.571	3.57143
1075	2	258	0.78	0.775194
1075	8	176	4.55	4.54545
1100	6	227	3	2.64317
1125	1	5	20	20
1133	44	120	0.38	36.6667
1150	4	175	2.29	2.28571
1175	3	53	5.66	5.66038
1188	1	1245	0.08	0.0803213
1213	1	117	0.85	0.854701
1213	3	31		9.67742
1225	7	8	87.5	87.5
1239	22	57	0.44	38.5965
1242	1	1	100
1250	135	622	21.7	21.7042
1250	34	43	79	79.0698
1275	1	10	10	10
1275	2	103	1.94	1.94175
1290	3	33	9.09	9.09091
1293	6	551	1.09	1.08893
1300	4	25	16	16
1329	1	1	100
1336	1	300	0.33	0.333333
1350	4	60	7	6.66667
1350	2	140	1.43	1.42857
1350	8	11	72.73	72.7273
1388	75	384	19.53	19.5312
1400	5	7	71.43	71.4286
1400	329	472	69.7	69.7034
1401	4	249	1.61	1.60643
1407	1	70	1.43	1.42857
1410	34	461	7.38	7.37527
1418	1	994	0.101	0.100604
1420	20	200	10	10
1438	4	108	3.7	3.7037
1450	603	635	95	94.9606
1450	1	5	20	20
1463	1	554	0.18	0.180505
1493	4	60	6.67	6.66667
1500	2	11	18.18	18.1818
1530	1	121	0.83	0.826446
1540	1	56	1.79	1.78571
1738	2	3	66.67	66.6667
1788	1	50	2	2
1839	1	301	0.33	0.332226
1900	1	15	6.67	6.66667
1905	3	5	60	60
				94.9606
